# Supplementary material for: PIMT/NCOA6IP Deletion in the Mouse Heart Causes Delayed Cardiomyopathy Attributable to Perturbation in Energy Metabolism
Source: MDPI journal article supplement (doi:10.3390/ijms19051485), 2018-05-16
Supplement: s1 [file s1]

## Supplementary data:

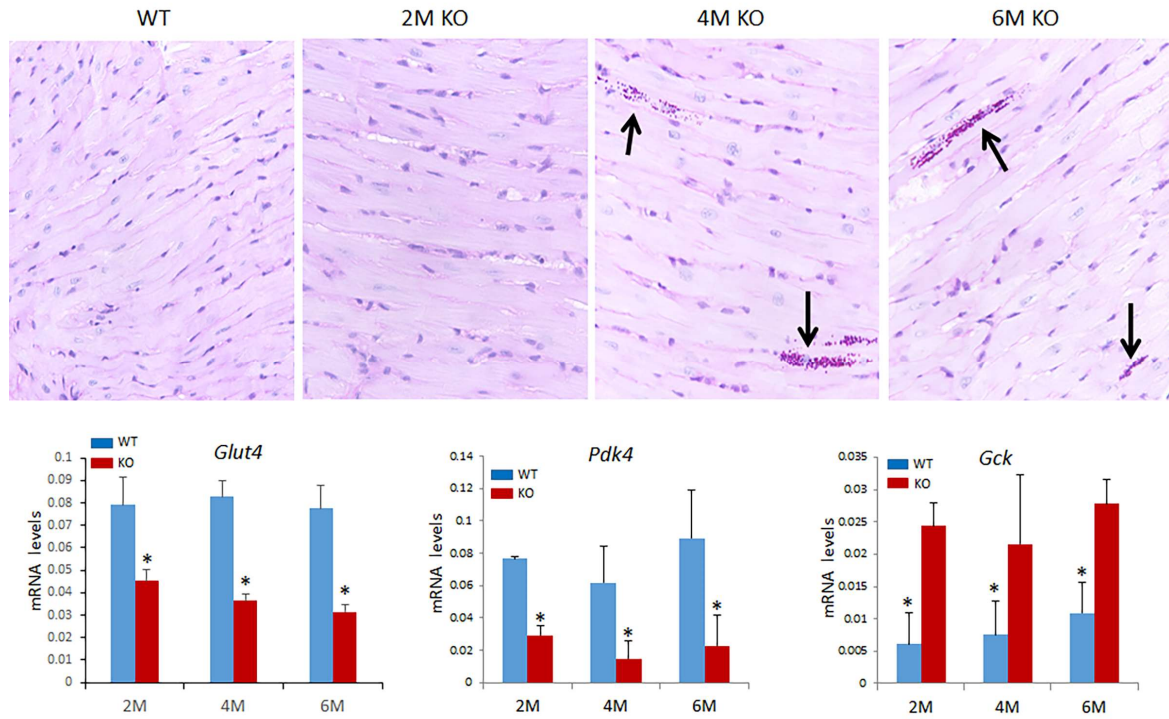

**Figure S1.** Glycogen storage in csPIMT<sup>-/-</sup> mouse hearts. (A) Images of PAS staining patterns of PIMT<sup>fl/fl</sup> and csPIMT<sup>-/-</sup> mouse hearts of 2, 4 and 6 months. Glycogen storage in csPIMT<sup>-/-</sup> hearts of 4 and 6 months is indicated by black arrows; (B) Quantification of mRNA levels for *Glut4*, *PDK4* and *Gck* in PIMT<sup>fl/fl</sup> and csPIMT<sup>-/-</sup> mouse hearts. mRNA levels were quantified by RT-qPCR assays. Each group was analyzed using 5 different mic and the values were expressed as the mean  $\pm$  SD. \*  $p < 0.05$ .

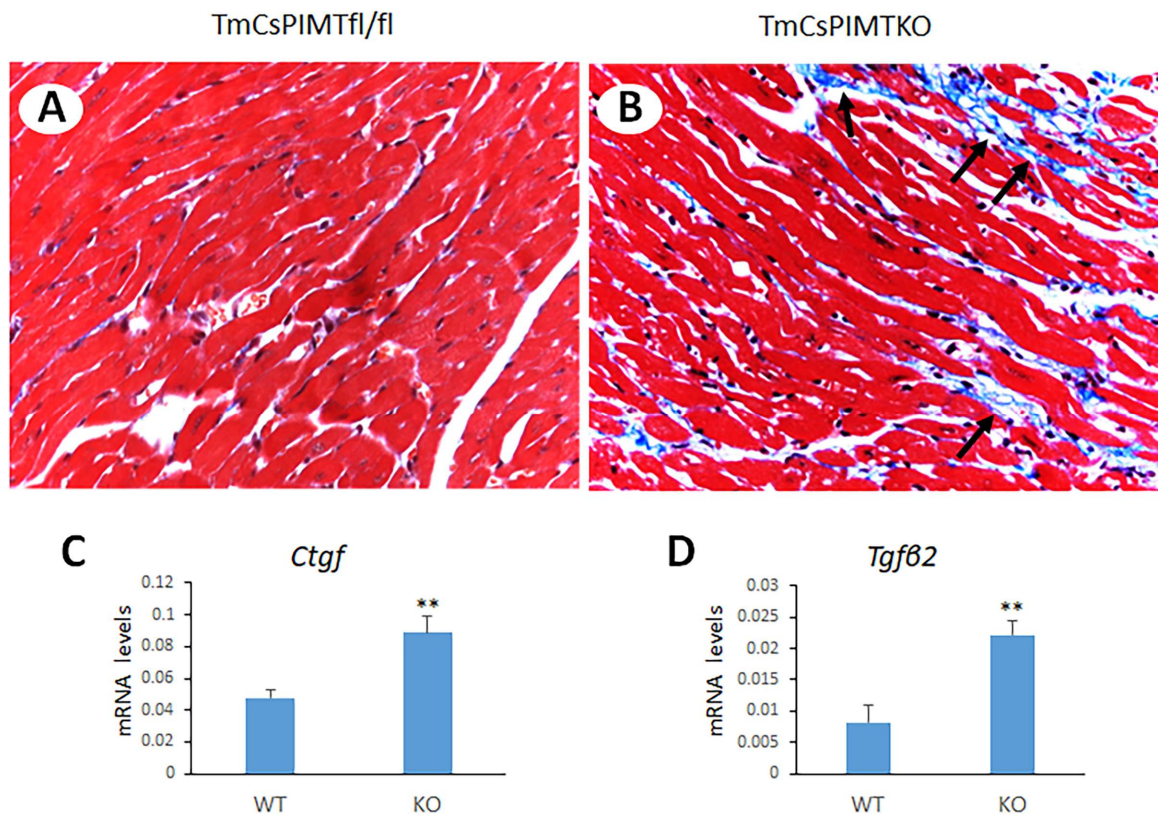

**Figure S2.** Cardiac fibrosis in TmcsPIMT<sup>-/-</sup> mouse heart. (A,B) Masson Trichrome staining images showing fibrosis (intensely stained blue color, shown by black arrow); (C,D) Quantification of mRNA levels for *Ctgf* and *Tgfβ2* in PIMT<sup>fl/fl</sup> and csPIMT<sup>-/-</sup> mouse hearts. mRNA levels were quantified by RT-qPCR assays. Each group was analyzed using 5 different mice and values were expressed as the mean ± SD. \*\*  $p < 0.01$ .
